# Supplementary material
Source: PubMed Central journal article supplement (PMC9595177)

## Supplementary Information

### Direct N- or C-terminal protein labeling via a sortase-mediated swapping approach

Min Cong<sup>1\*</sup>, Soheil Tavakolpour<sup>1\*</sup>, Lea Berland<sup>1\*</sup>, Hannah Glockner<sup>1</sup>, Bohdan Andreiuk<sup>1</sup>, Taha Rakhshandehroo<sup>1</sup>, Safak Uslu<sup>1</sup>, Shruti Mishra<sup>1</sup>, Louise Clark<sup>1</sup>, and Mohammad Rashidian<sup>1\*\*</sup>

<sup>1</sup> Dana-Farber Cancer Institute and Harvard Medical School, Boston, MA 02215, USA.

\* These authors contributed equally to this work

\*\* Correspondence: mohammad\_rashidian@dfci.harvard.edu

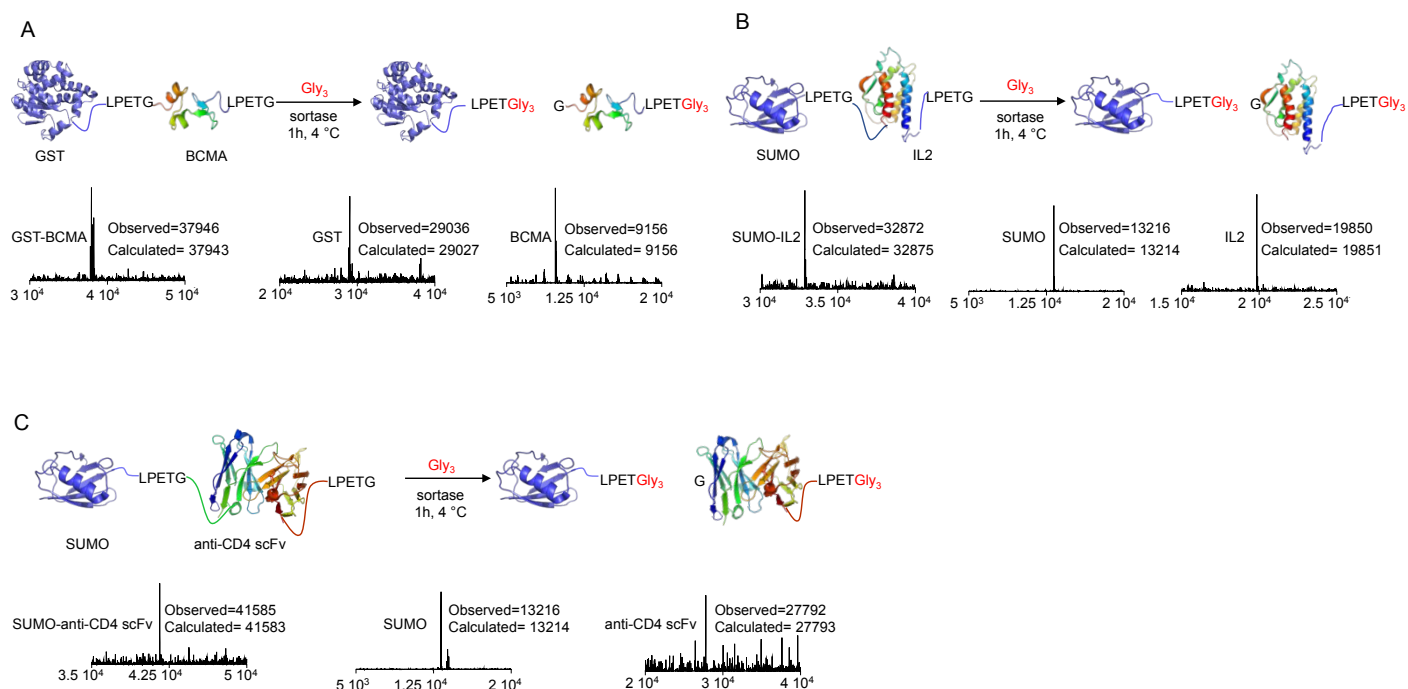

**Figure S1. Fusion tag cleavage using sortase.** A, B, C) GST-BCMA, SUMO-IL2, and SUMO-anti-CD4 scFv fusion proteins were rapidly and quantitatively cleaved via the addition of sortase and Gly3 substrate. LC-MS analyses confirmed the formation of the products.

### 1. Sequences of recombinant protein substrates produced in this study. Sortase recognition tags are underlined.

#### 1.1. GFP:

MHHHHHHLPETGGGGGSGGSGGSGGSGGVSKGEELFTGVVPILVELDGDVNGHKFSVSGEGEGDATYGKL  
 TLKFICTTGKLPVPWPTLVTTLTYGVCFSRYPDHMKQHDFKSAPEGYVQERTIFFKDDGNYKTRAEVKFE  
 GDTLVNRIELKGIDFKEDGNILGHKLEYNYNSHNVYIMADKQKNGIKVNFKIRHNIEDGSVQLADHYQQNTPIGD  
 GPVLLPDNHYLSTQSALSKDPNEKRDHVMVLEFVTAAGITLGMDELYK

#### 1.2. GST-BCMA:

MSPILGYWKIKGLVQPTRLLEYLEEKYEEHLYERDEGDKWRNKKFELGLEFPNLPYYIDGDVTKLTQSMARIYI  
 ADKHNMLGGCPKERAIEISMLEGAVLDIRYGVSRAYSKDFETLKVDFLSKLPEMLKMFEDRLCHKTYLNGDHVT

HPDFMLYDALDVVLYMDPMCLDAFPKLVCFKKRIEAIQIDKYLKSSKYIAWPLQGQWQATFGGGDHPPKSDLE  
VLFQGPESHSHHHHHHHHHGGGGSLPETGSDYKDDDDKGGSMQAGQCSQNEYFDSLLHACIPCQLRCSS  
NTPPLTCQRYCNASVTNSVKGTNAGGGGSDYKDDDDKLPETGG

### 1.3. SUMO-BCMA:

**MKYLLPTAAAGLLLLAAQPAMA**GSMSDSEVNQEAKPEVKPEVKPETHINLKVSDGSSEIFFKIKKTTPLRRLME  
AFAKRQKGEMDSLRFYDGIQADQTPEDLDMEDNDIIEAHREQIGGGGSDYKDDDDKLPETGGGGSGGGS  
GGGDYKDDDDKMLQAGQCSQNEYFDSLLHACIPCQLRCSSNTPPLTCQRYCNASVTNSVKGTNAGSDYKD  
DDDKHHHHHH

\*In red is the pelB sequence that is cleaved upon periplasmic expression.

### 1.4. SUMO-IL2

**MKYLLPTAAAGLLLLAAQPAMA**GSMSDSEVNQEAKPEVKPEVKPETHINLKVSDGSSEIFFKIKKTTPLRRLME  
AFAKRQKGEMDSLRFYDGIQADQTPEDLDMEDNDIIEAHREQIGGGGSDYKDDDDKLPETGGGGSGGGS  
GGSGGGPTSSPTSSPTSSSTAEAQQQQQQQHLEQLLMDLQELLSRMENYRNLKLPRLTFKFYLPKQAT  
ELKDLQCLEDELGPLRHVLDLTQSKSFQLEDAENFISNIRVTVVKLKGSDNTFECQFDDDESATVVDVFLRRWIAF  
CQSIISTSPQDYKDDDDKHHHHHH

\*In red is the pelB sequence that is cleaved upon periplasmic expression.

### 1.5. SUMO-anti-CD4 scFv

GSMSDSEVNQEAKPEVKPEVKPETHINLKVSDGSSEIFFKIKKTTPLRRLMEAFKRQKGEMDSLRFYDGIQ  
ADQTPEDLDMEDNDIIEAHREQIGGGGSDYKDDDDKLPETGSSGSEVQLVQSGAELVKPGASVKLSCKVSDY  
NIRRTYMHWRQRPKGLEWIGRIDPANGNTIYGEKFKSKATLTADTSSNTAYMQLSQLKSDDTAIYYCAIGVQ  
YLDYWGQGTTVTVSSGGGGSGGGGSGGGGSDIVLTQSPALAVSPGERVTISCRATESVSTLIHWYQQRPGQ  
QPKLLIYLTSHLDGVPARFSGSGSGTDFLTIDPVEADDTATYYCQQQWVNDPWFVGGGKLELKRGGGSDY  
KDDDDKLPETGGHHHHHH

**2. Structures, Mass Spectra, and HPLC analyses of the sortase substrates used in this study (peptides were custom synthesized at GenScript company):**

**2.1. azide-LPETG**

Peptide sequence: {Lys(N3)}GSLPETGG; C-terminal: amide; Theoretical MW: 869.93

MS analysis:

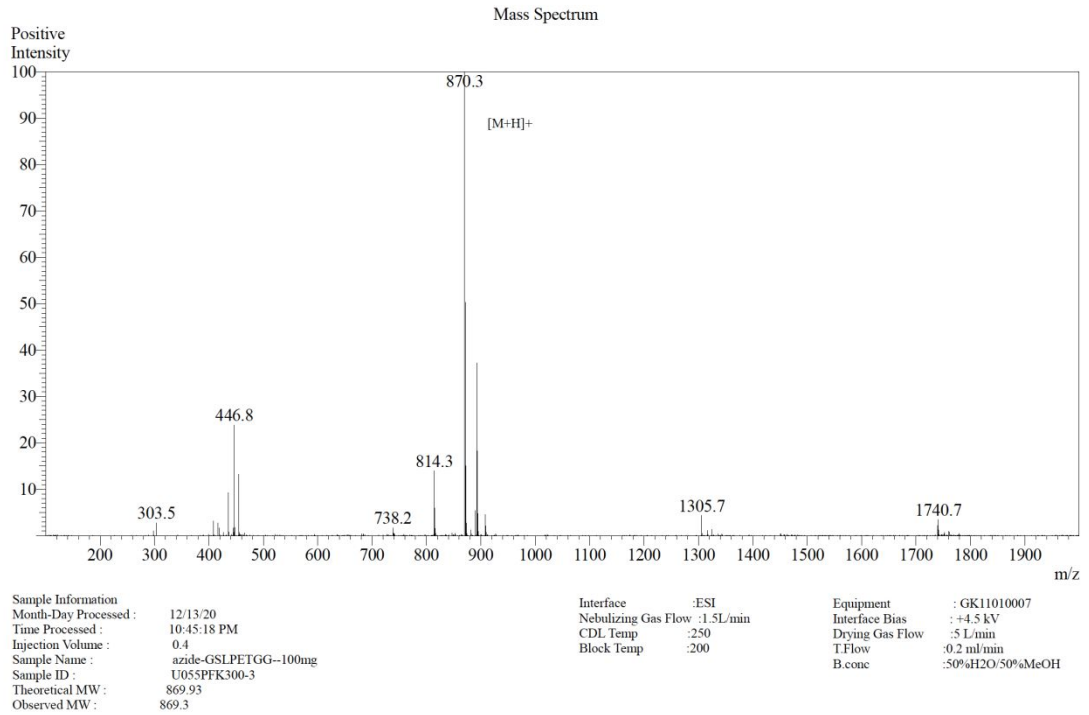

HPLC analysis:

Purity: 90.1%

Pump A : 0.065% trifluoroacetic in 100% water (v/v)  
 Pump B : 0.05% trifluoroacetic in 100% acetonitrile (v/v)  
 Total Flow:1 ml/min  
 Wavelength:220 nm  
 <<LC Time Program>>

| Time  | Module     | Command | Value |
|-------|------------|---------|-------|
| 0.01  | Pumps      | B.Conc  | 5     |
| 25.00 | Pumps      | B.Conc  | 65    |
| 25.01 | Pumps      | B.Conc  | 95    |
| 27.00 | Pumps      | B.Conc  | 95    |
| 27.01 | Pumps      | B.Conc  | 5     |
| 35.00 | Pumps      | B.Conc  | 5     |
| 35.01 | Controller | Stop    |       |

<<Column Performance>>  
 <Detector A>  
 Column :Inertsil ODS-3 4.6 x 250 mm  
 Equipment: ZJ17010508

**<Chromatogram>**

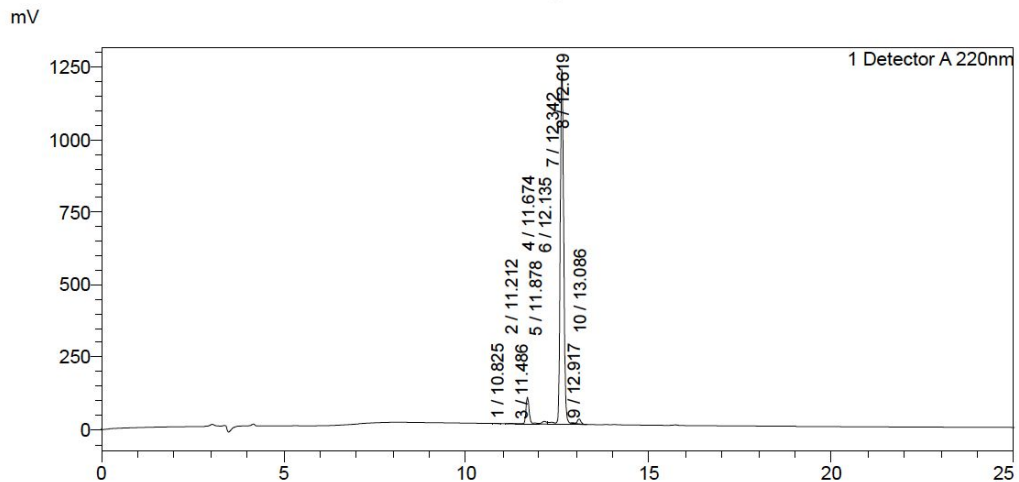

## 2.2. alkyne-LPETG

Peptide sequence: {Pra}SLPETGS; C-terminal: amide; Theoretical MW: 783.83

MS analysis:

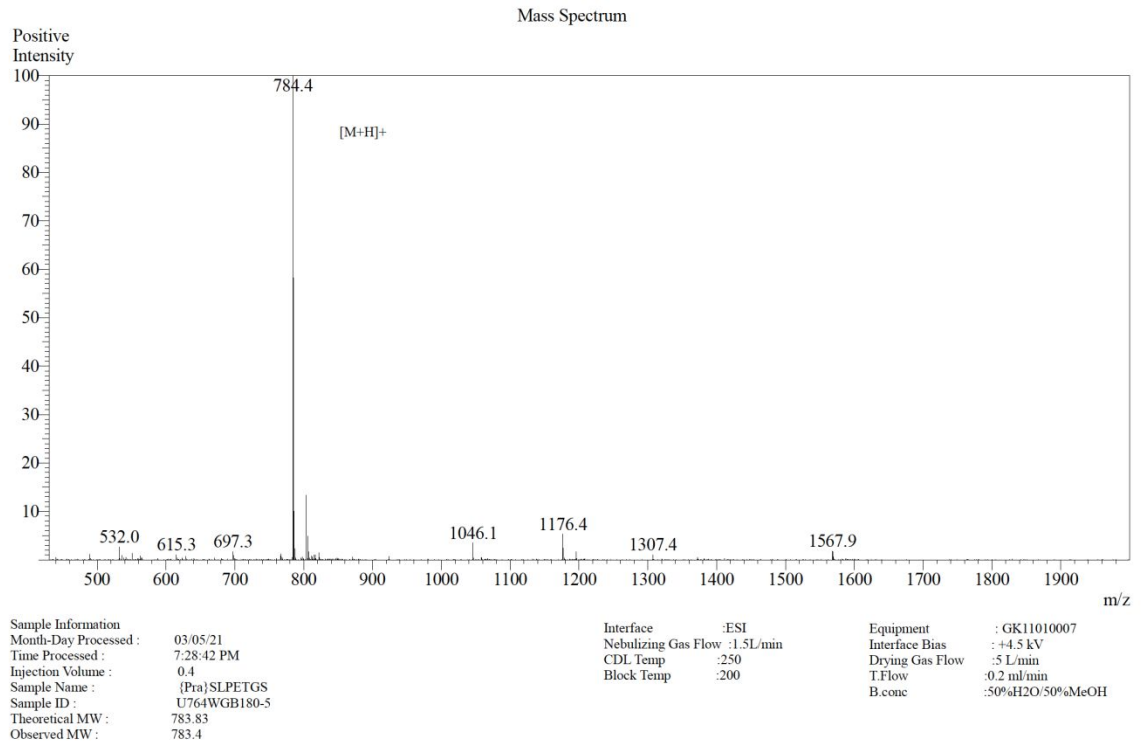

HPLC analysis:

Purity: 93.3%

Pump A : 0.065% trifluoroacetic in 100% water (v/v)  
 Pump B : 0.05% trifluoroacetic in 100% acetonitrile (v/v)

Total Flow: 1 ml/min

Wavelength: 220 nm

<<LC Time Program>>

| Time  | Module     | Command | Value |
|-------|------------|---------|-------|
| 0.01  | Pumps      | B.Conc  | 5     |
| 25.00 | Pumps      | B.Conc  | 65    |
| 25.01 | Pumps      | B.Conc  | 95    |
| 27.00 | Pumps      | B.Conc  | 95    |
| 27.01 | Pumps      | B.Conc  | 5     |
| 35.00 | Pumps      | B.Conc  | 5     |
| 35.01 | Controller | Stop    |       |

<<Column Performance>>

<Detector A>

Column : Inertsil ODS-3 4.6 x 250 mm

Equipment: GK11010009

<Chromatogram>

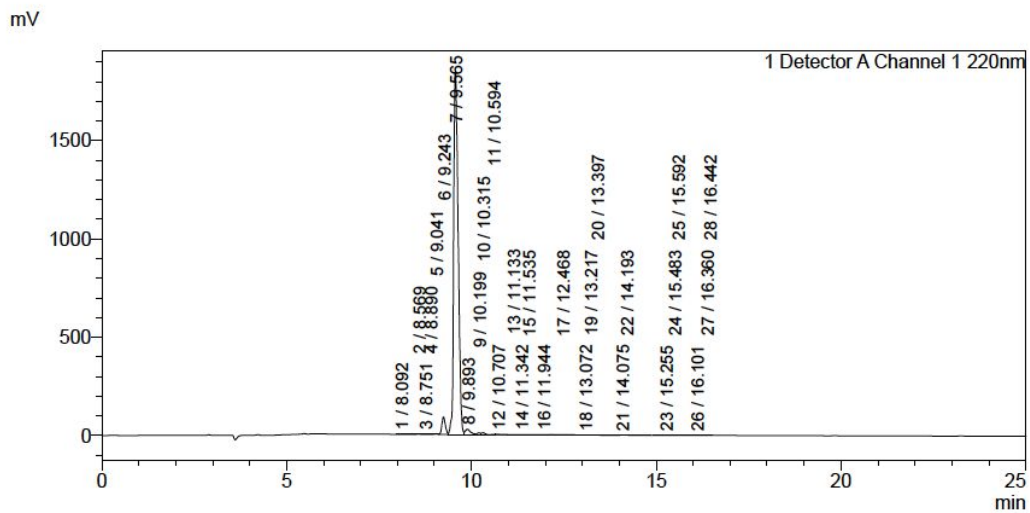

### 2.3. Gly<sub>3</sub>-Biotin

Peptide sequence: GGG{PEG3}{Lys(biotin)}; Theoretical MW: 747.14

MS analysis:

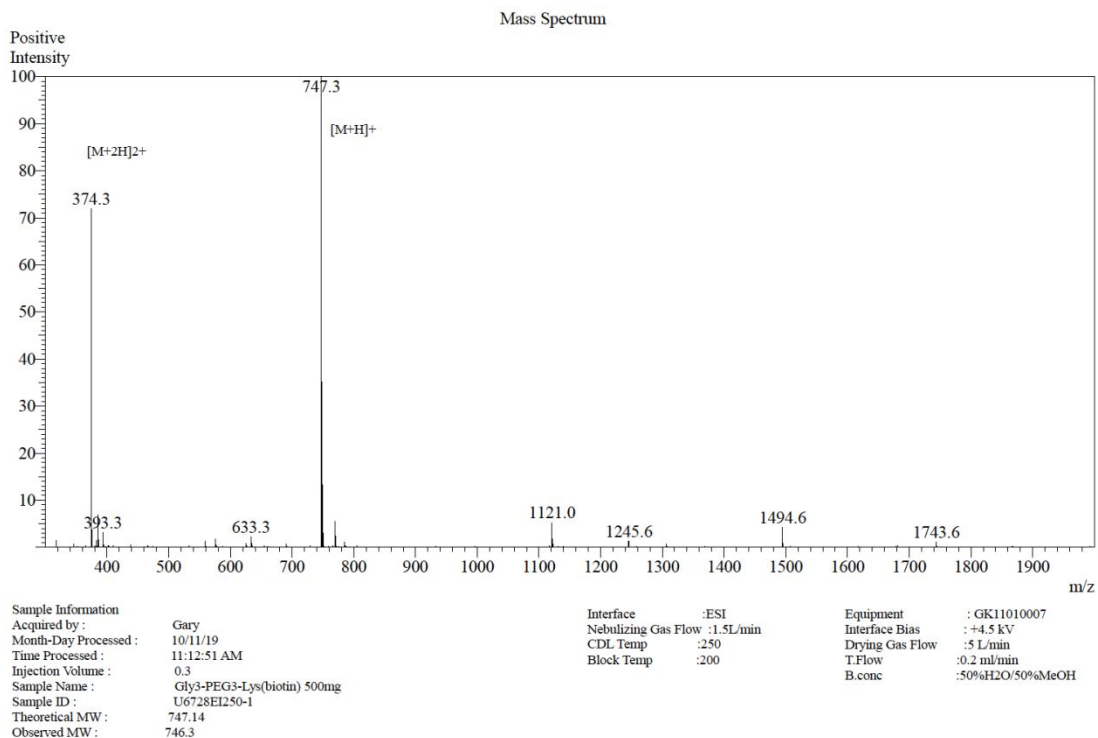

HPLC analysis:

Purity: 94.3%

Pump A : 0.065% trifluoroacetic in 100% water (v/v)  
 Pump B : 0.05% trifluoroacetic in 100% acetonitrile (v/v)  
 Total Flow: 1 ml/min  
 Wavelength: 220 nm  
 <<LC Time Program>>

| Time  | Module     | Command         | Value |
|-------|------------|-----------------|-------|
| 0.01  | Pumps      | Solvent B Conc. | 5     |
| 25.00 | Pumps      | Solvent B Conc. | 65    |
| 25.01 | Pumps      | Solvent B Conc. | 95    |
| 27.00 | Pumps      | Solvent B Conc. | 95    |
| 27.01 | Pumps      | Solvent B Conc. | 5     |
| 35.00 | Pumps      | Solvent B Conc. | 5     |
| 35.01 | Controller | Stop            |       |

<<Column Performance>>  
 <Detector A>  
 Column : Inertsil ODS-3 4.6 x 250 mm  
 Equipment: ZJ17010508

#### <Chromatogram>

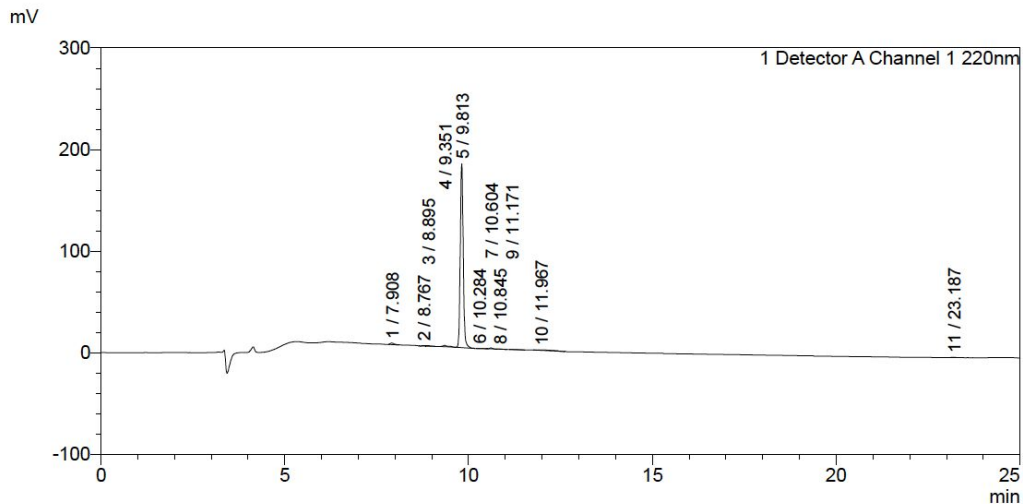

Supplement: NIHMS1839314-supplement-Supplementary_Material.pdf [file NIHMS1839314-supplement-Supplementary_Material.pdf]
